# Supplementary material for: Calculation method to predict postoperative limb length in patients undergoing THA following developmental dysplasia of hips
Source: BMC Musculoskelet Disord. 2019 Nov 3;20:513. doi: 10.1186/s12891-019-2903-7 (PMC6827358; doi:10.1186/s12891-019-2903-7)
Supplement: Supplementary file 1 — Additional file 1. The excel file which can help related calculation. [file 12891_2019_2903_MOESM1_ESM.xlsx]

## Sheet: Sheet1
Contralateral bony LL	636.9	∠ATF(°)	8.2
TA	640.2	Angle of Pelvis Plane & CORs (°)	-3.3	Higher Hip Center is PLUS	Lower Hip Center is MINUS
Contralateral Offset	28	Vertical drop between CORs	-8.92818
Contralateral Femur Head r	24	Acceptable clinical LLD	15
Distance between CORs	155.1	Acceptable bony LLD	20
Target LL for	min		max
Pelvis horizontal	612.972	627.972	642.972
CORs horizontal	616.9	636.9	656.9	select union
	616.9		642.972
30 Neck Length	Proximal >12	Distal 6-13
FH+-.-0,3,+6	3	min	CORs Horizontal	Pelvis Horizontal	max
	initial x	1	1	1	1
Offset 28	up	55.9652	55.9652	55.9652	55.9652
28	down	356.512	368.781	363.304	372.506
Vertical Drop 21	x n	-0.831639	-0.528767	-0.661411	-0.440816
	up+1	53.6305	54.0204	53.8498	54.1333
	down+1	341.173	355.572	349.146	359.941
	x n+1	-0.844077	-0.538512	-0.672302	-0.449829
	Neck Height	-59.9961	-39.6052	-48.7047	-33.4197
	Sleeve Height	-53.9961	-33.6052	-42.7047	-27.4197
36 Neck Length	Proximal >14	Distal >9					30+4 Neck Length	Proximal >14	Distal 9-13
FH+-:-0,3,+6	3	min	COR	Pelvis	max		FH+-:-0,3,+6	3	min	COR	Pelvis	max
	initial x	1	1	1	1			initial x	1	1	1	1
Offset 32	up	55.9652	55.9652	55.9652	55.9652		Offset	up	55.9652	55.9652	55.9652	55.9652
32	down	358.45	359.462	358.717	360.321		32	down	358.45	359.462	359.462	360.321
Vertical Drop 25	x n	-0.782394	-0.756905	-0.775653	-0.735383		VD	x n	-0.782394	-0.756905	-0.756905	-0.735383
25	up+1	53.694	53.7268	53.7027	53.7546		21	up+1	53.694	53.7268	53.7268	53.7546
	down+1	338.812	350.807	345.387	354.572			down+1	338.812	350.807	345.548	354.572
	x n+1	-0.918521	-0.609642	-0.744943	-0.519892			x n+1	-0.918521	-0.609642	-0.744806	-0.519892
	Neck Height	-64.7585	-44.4771	-53.5322	-38.3168			Neck Height	-64.7585	-44.4771	-53.5231	-38.3168
	Sleeve Height	-58.7585	-38.4771	-47.5322	-32.3168			Sleeve Height	-54.7585	-34.4771	-43.5231	-28.3168
42 NL	Proximal >22	Distal >17
FH+-:-0,3,+6	3	min	COR	Pelvis	max
	initial x	1	1	1	1
Offset	up	55.9652	55.9652	55.9652	55.9652
37	down	355.594	354.933	354.894	355.362
VD	x n	-0.855146	-0.872159	-0.873151	-0.86111
29	up+1	53.6002	53.5782	53.5769	53.5925
	down+1	334.716	346.326	341.071	349.99
	x n+1	-1.0148	-0.699674	-0.837702	-0.608118
	Neck Height	-70.8046	-50.5329	-59.5846	-44.3736
	Sleeve Height	-64.8046	-44.5329	-53.5846	-38.3736

## Sheet: HowToUse
Instructions
1. Adjust the magnification.
2. Take the measurements on the two radiographs.
2.1 Red Line: Contralateral Leg length.
2.2 Blue Line: The distance from the projection point of the Great Trochanter on the Femoral axis to Ankle.
2.3 Green Angle: The angle between Blue Line and Femoral Axis.
2.4 White Line: Pelvic reference line. In this case is ASIS Line.
2.5 Orange Circle: Target position of acetabular prosthesis.
2.6 Pink Line: CORs Line.
3. Fill in the Form.
4. Select the appropriate prosthesis based on the offset and the femoral canal diameter.
5. The Form will calculate the height of the sleeve installation.
Red Line	637.3	∠Green Angle(°)	2.1
Blue Line	654.5	∠(Pink and White)(°)	3.5	Higher Hip Center is PLUS	Lower Hip Center is MINUS
Contralateral Offset	31	Vertical drop between CORs	10.1646
Contralateral FemurHead Diameter	50	Acceptable clinical LLD	15
Pink Line	166.5	Acceptable bony LLD	20
Target LL for	min		max
Pelvis horizontal	632.465	647.465	662.465
CORs horizontal	617.3	637.3	657.3	select union
	632.465		657.3
30 Neck Length	Proximal >12	Distal 6-13
FH+-：-0,3,+6	3	min	CORs horizontal	Pelvis horizontal	max
	initial x	1	1	1	1
Offset 28	up	16.6301	16.6301	16.6301	16.6301
28	down	416.141	419.498	426.554	433.381
Vertical Drop 21	x n	-0.190297	-0.171961	-0.134359	-0.0991421
	up+1	16.2675	16.2731	16.2847	16.2955
	down+1	406.666	410.098	417.311	424.289
	x n+1	-0.192564	-0.174158	-0.136418	-0.101077
	Neck Height	-54.9893	-50.1356	-39.9337	-30.0632
	Sleeve Height	-48.9893	-44.1356	-33.9337	-24.0632
36 Neck Length	Proximal >14	Distal >9					30+4 Neck Length	Proximal >14	Distal 9-13
FH+-:-0,3,+6	3	min	COR	Pelvis	max		FH+-:-0,3,+6	3	min	COR	Pelvis	max
	initial x	1	1	1	1			initial x	1	1	1	1
Offset 32	up	16.6301	16.6301	16.6301	16.6301		Offset	up	16.6301	16.6301	16.6301	16.6301
32	down	412.907	414.032	416.965	420.675		32	down	412.907	414.032	414.032	420.675
Vertical Drop 25	x n	-0.208243	-0.201972	-0.185768	-0.1656		VD	x n	-0.208243	-0.201972	-0.201972	-0.1656
25	up+1	16.262	16.2639	16.2689	16.2751		21	up+1	16.262	16.2639	16.2639	16.2751
	down+1	403.572	406.906	413.942	420.79			down+1	403.572	406.906	413.809	420.79
	x n+1	-0.209362	-0.190703	-0.152441	-0.116608			x n+1	-0.209362	-0.190703	-0.152474	-0.116608
	Neck Height	-59.3516	-54.5021	-44.3066	-34.4395			Neck Height	-59.3516	-54.5021	-44.3156	-34.4395
	Sleeve Height	-53.3516	-48.5021	-38.3066	-28.4395			Sleeve Height	-49.3516	-44.5021	-34.3156	-24.4395
42 NL	Proximal >22	Distal >17
FH+-:-0,3,+6	3	min	COR	Pelvis	max
	initial x	1	1	1	1
Offset	up	16.6301	16.6301	16.6301	16.6301
37	down	409.136	409.924	412.233	415.469
VD	x n	-0.229532	-0.225053	-0.212021	-0.194003
29	up+1	16.2554	16.2568	16.2608	16.2664
	down+1	399.693	403.013	410.021	416.851
	x n+1	-0.230849	-0.211836	-0.172858	-0.136362
	Neck Height	-64.8398	-59.9887	-49.7897	-39.9183
	Sleeve Height	-58.8398	-53.9887	-43.7897	-33.9183
